# Supplementary material
Source: ML conference proceedings conference paper supplement (https://www.ecva.net/papers/eccv_2020/papers_ECCV/html/123460477_ECCV_2020_paper.php)
Supplement: Supplementary file 1 [file 123460477-supp.pdf]

# Supplementary Material: Learn to Recover Visible Color for Video Surveillance in a Day

Guangming Wu<sup>1</sup>, Yinqiang Zheng<sup>2\*</sup>, Zhiling Guo<sup>1</sup>, Zekun Cai<sup>1</sup>, Xiaodan Shi<sup>1</sup>,  
Xin Ding<sup>3,4</sup>, Yifei Huang<sup>1</sup>, Yimin Guo<sup>1</sup>, and Ryosuke Shibasaki<sup>1</sup>

<sup>1</sup> The University of Tokyo, Tokyo 113-8654, Japan  
{huster-wgm, guozhilingcc, caizekun, shixiaodan, guo.ym, shiba}@csis.u-tokyo.ac.jp,  
hyf@iis.u-tokyo.ac.jp

<sup>2</sup> National Institute of Informatics, Tokyo 101-8430, Japan  
yqzheng@nii.ac.jp

<sup>3</sup> Wuhan University, Hubei 430072, China

<sup>4</sup> Peng Cheng Laboratory, Shenzhen 518055, China  
ding-xin@whu.edu.cn

## 1 The VSIAD dataset.

To train the SSN model for video surveillance in a day, it is a big challenge to get sufficient data with ground truth image pairs, *i.e.*, paired VNIR&VC images of daytime, and NIR&VC images of nighttime.

As shown in the table below, current public datasets, such as KAIST-MS[6], FOI[5], and RANUS[1], are lack of several required aspects (*e.g.*, unaligned and static) that are indispensable for training SSN for all-day surveillance. Thus, this motivated us to build new optical devices to capture our VSIAD dataset. We will release it publicly to facilitate related researches.

**Table S.1.** Comparison of datasets.

| Dataset     | NIR&VC | VNIR&VC | Outdoor | Video | High res.* | Aligned |
|-------------|--------|---------|---------|-------|------------|---------|
| KAIST-MS[6] | ✓(TIR) |         | ✓       |       |            |         |
| FOI[5]      | ✓(TIR) |         | ✓       |       |            | ✓       |
| [2]         | ✓      |         |         | ✓     |            |         |
| [7]         |        | ✓       |         |       |            |         |
| RANUS[1]    | ✓      |         | ✓       | ✓     | ✓          |         |
| [3]         | ✓      |         |         |       | ✓          |         |
| [4]         | ✓      | ✓       |         |       | ✓          | ✓       |
| Ours        | ✓      | ✓       | ✓       | ✓     | ✓          | ✓       |

\* > [640x480]

\* Yinqiang Zheng is the corresponding author. This work was supported in part by the JSPS KAKENHI under Grant No. 19K20307. A part of this work was finished during Y. Zheng's visit and X. Ding's internship at Peng Cheng Laboratory.

## 2 Devices for the time-elapse experiment.

To evaluate the proposed method’s robustness and generalization capability, we test our trained model on real-world time-elapse images captured from a static viewpoint. We also use a CMOS camera (FLIR BFS-U3-63S4C) and remove its IR-cut filter, which is different from the CCD camera (FLIR GS3-U3-15S4C) in training data capture. These two cameras can represent the two main-stream types of silicon sensors in the surveillance industry.

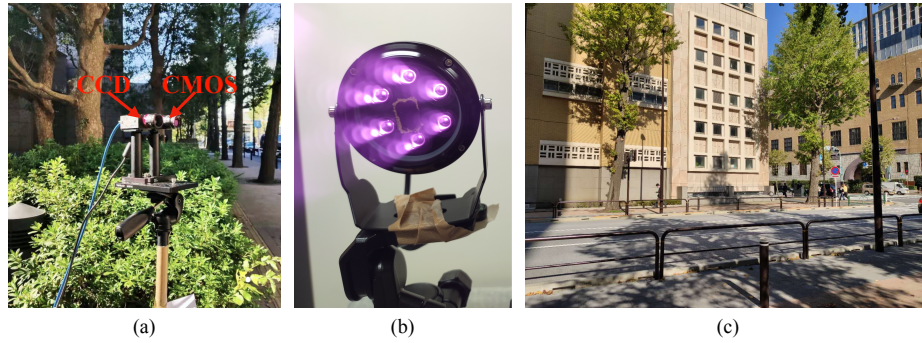

**Fig. 1.** Devices for time-elapse experiment. (a) The fixed CCD and CMOS cameras; (b) The 850 nm LED illuminant; and (c) The targeted viewpoint.

## References

1. Choe, G., Kim, S.H., Im, S., Lee, J.Y., Narasimhan, S.G., Kweon, I.S.: Ranus: Rgb and nir urban scene dataset for deep scene parsing. *IEEE Robotics and Automation Letters* **3**(3), 1808–1815 (2018)
2. Dou, H., Chen, C., Hu, X., Peng, S.: Asymmetric cyclegan for unpaired nir-to-rgb face image translation. In: *ICASSP 2019-2019 IEEE International Conference on Acoustics, Speech and Signal Processing (ICASSP)*. pp. 1757–1761. IEEE (2019)
3. Fredembach, C., Süsstrunk, S.: Colouring the near-infrared. In: *Color and Imaging Conference*. vol. 2008, pp. 176–182. Society for Imaging Science and Technology (2008)
4. Lv, F., Zheng, Y., Li, Y., Lu, F.: An integrated enhancement solution for 24-hour colorful imaging. In: *AAAI*. pp. 11725–11732 (2020)
5. Mehri, A., Sappa, A.D.: Colorizing near infrared images through a cyclic adversarial approach of unpaired samples. In: *2019 IEEE/CVF Conference on Computer Vision and Pattern Recognition Workshops (CVPRW)*. pp. 971–979. IEEE (2019)
6. Nyberg, A., Eldesokey, A., Bergström, D., Gustafsson, D.: Unpaired thermal to visible spectrum transfer using adversarial training. In: *European Conference on Computer Vision Workshops*. pp. 657–669. Springer (2018)

7. Özkan, K., Işık, Ş., Topsakal Yavuz, B.: Identification of wheat kernels by fusion of rgb, swir, vnir samples over feature and image domain. Journal of the Science of Food and Agriculture (2019)
